# Supplementary material
Source: ML conference proceedings conference paper supplement (https://openaccess.thecvf.com/content/CVPR_2020/html/Maeda_Unpaired_Image_Super-Resolution_CVPR_2020_paper.html)
Supplement: Supplementary file 1 [file Maeda_Unpaired_Image_Super-Resolution_CVPR_2020_supplemental.pdf]

# Unpaired Image Super-Resolution using Pseudo-Supervision

## *Supplementary Material*

This supplementary material provides the visual results on the AIM 2019 Real-World Super-Resolution Challenge Track 2 dataset (Fig. S1). Numerical results are provided in Sec. 4.5 of the main paper.

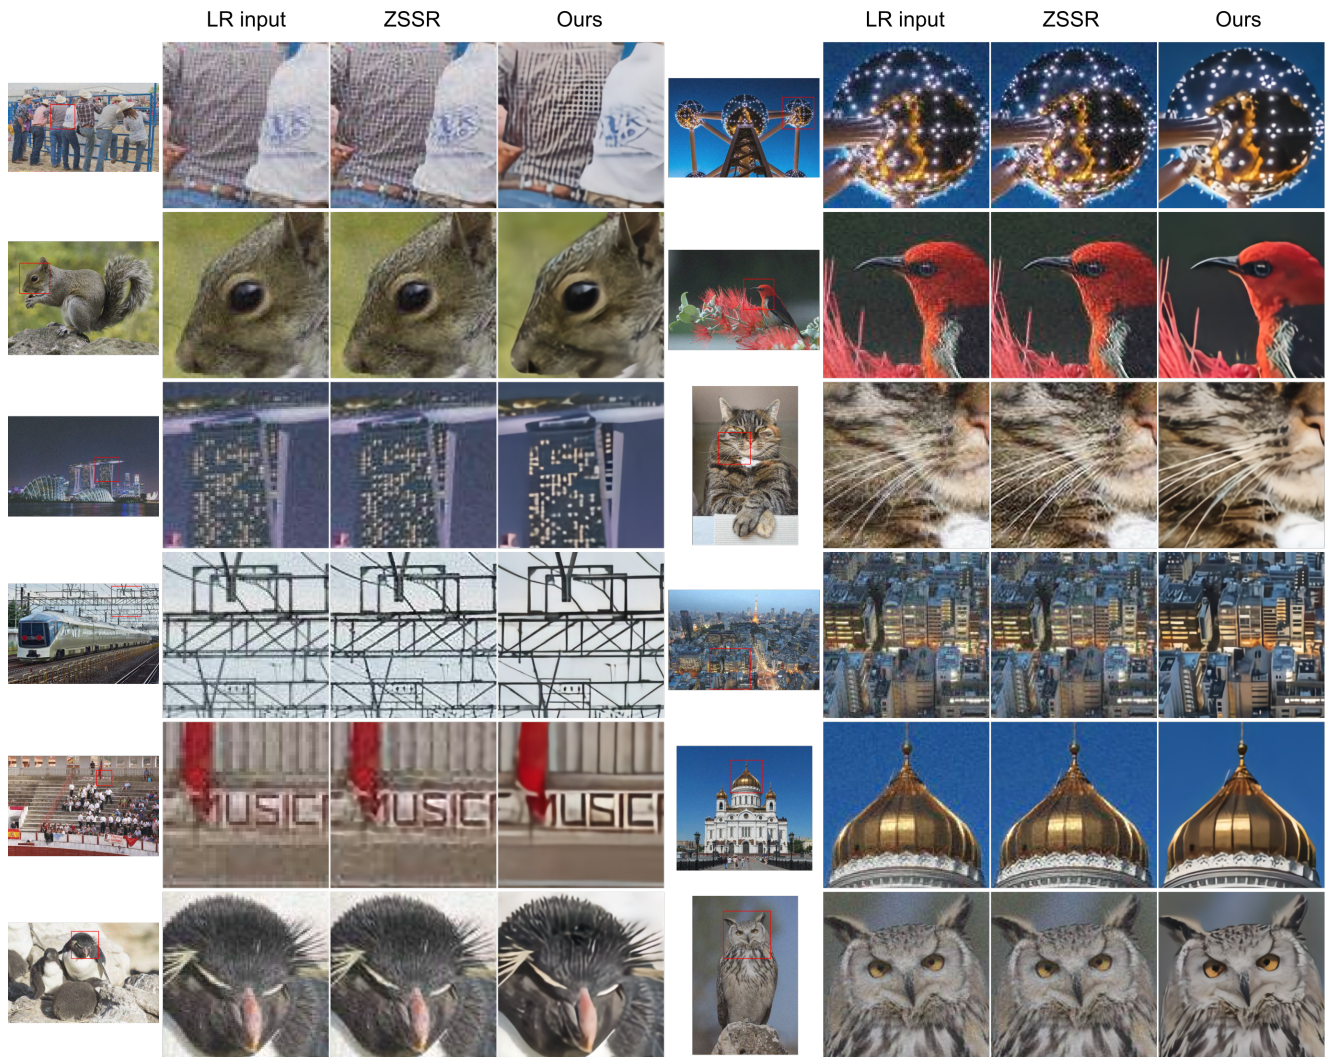

Figure S1: Visual results on AIM 2019 Real-World Super-Resolution Challenge validation set (Track 2). Zoom in for better view.
